# Supplementary material for: The user’s guide to comparative genomics with EnteroBase, including case studies on transmissions of micro-clades of Salmonella, the phylogeny of ancient and modern Yersinia pestis genomes, and the core genomic diversity of all Escherichia
Source: bioRxiv or medRxiv preprint supplement (doi:10.1101/613554), 2019-11-25
Supplement: Supplementary file [file media-1.pdf]

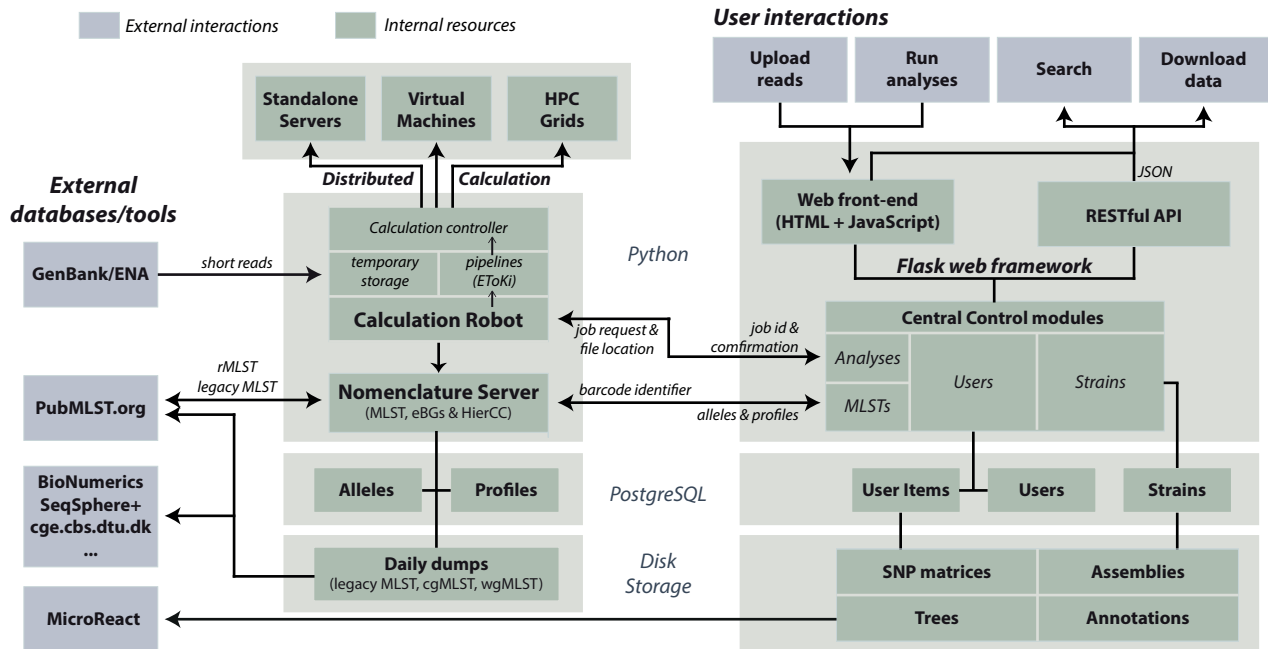

**Supplementary Figure 1. Overview of workflow within EnteroBase.** EnteroBase offers its users interactions via a web browser front end or a RESTful API (Application Programming Interface), both of which connect to a Python Flask web framework environment that handles all further interactions with structured data (PostgreSQL databases) and stored files in disk storage via Central Control modules. These central control modules are also responsible for interacting via JSON strings with the Calculation Robot and Nomenclature Server, which in turn also interact with external database environments. Further details on the API commands can be found at <http://tinyurl.com/EnteroBaseAPIDocs>.

**A**

Search all Strains of Yersinia

Predefined Search: All Strains | My Strains | Latest | 200

Ignore Legacy Data  Only Editable Strains  Show Failed Assemblies  Show Sub Strains

Strain Metadata  AND  OR Experimental Data

| Field | Operator | Value |
|-------|----------|-------|
| Name  | contains | CO92  |

Show Sub Strains

Data View Workspace Experiment Workspace:None Rows Total:2 Filtered:2

| Uberstrain     | Name                 | Data Source   | Lab Contact                    | Comment          | ST  | HC0 (indis...) | HC2 | HC5 | HC10 |
|----------------|----------------------|---------------|--------------------------------|------------------|-----|----------------|-----|-----|------|
| ■ YER_AA2313AA | CO92-2003-version    | GCF_000009065 | Sanger Institute               | Genotype: 1.OR1e | 159 | 159            | 159 | 159 | 92   |
| ■ YER_AA0760AA | CO92-2015-Los Alamos | SRR2148795    | Los Alamos National Laboratory | Genotype: 1.OR1e | 646 | 646            | 175 | 175 | 92   |

**B**

Search all Strains of Yersinia

Predefined Search: All Strains | My Strains | Latest | 200

Ignore Legacy Data  Only Editable Strains  Show Failed Assemblies  Show Sub Strains

Strain Metadata  AND  OR Experimental Data

| Field | Operator | Value |
|-------|----------|-------|
| Name  | contains | CO92  |

Show Sub Strains

Data View Workspace Experiment Workspace:None Rows Total:30 Filtered:2

| Uberstrain     | Name                 | Data Source   | Lab Contact                    | Comment          | ST  | HC0 (indis...) | HC2 | HC5 | HC10 |
|----------------|----------------------|---------------|--------------------------------|------------------|-----|----------------|-----|-----|------|
| ■ YER_AA2313AA | CO92-2003-version    | GCF_000009065 | Sanger Institute               | Genotype: 1.OR1e | 159 | 159            | 159 | 159 | 92   |
| ▼ YER_AA0760AA | CO92-2015-Los Alamos | SRR2148795    | Los Alamos National Laboratory | Genotype: 1.OR1e | 646 | 646            | 175 | 175 | 92   |

Data View Workspace Experiment Workspace:None Rows Total:30 Filtered:28

| Uberstrain     | Name                    | Data Source   | Lab Contact                    | Comment             | ST   | HC0 (indis...) | HC2 | HC5 | HC10 |
|----------------|-------------------------|---------------|--------------------------------|---------------------|------|----------------|-----|-----|------|
| ■ YER_AA2313AA | CO92-2003-version       | GCF_000009065 | Sanger Institute               | Genotype: 1.OR1e    | 159  | 159            | 159 | 159 | 92   |
| ▼ YER_AA0760AA | CO92-2015-Los Alamos    | SRR2148795    | Los Alamos National Laboratory | Genotype: 1.OR1e    | 646  | 646            | 175 | 175 | 92   |
| └              | CO92                    | MLST(Legacy)  | Sanger Institute               |                     |      | ND             | ND  | ND  | ND   |
| └              | CO92-2014Illumina + 454 | SRR2180227    | Los Alamos National Laboratory |                     | 218  | 218            | 175 | 175 | 92   |
| └              | Yp1980                  | SRR4072010    | Northern Arizona University    | CO92                | 1762 | 1762           | 175 | 175 | 92   |
| └              | Yp2005                  | SRR4072020    | Northern Arizona University    | prairie dog passage | 218  | 218            | 175 | 175 | 92   |
| └              | Yp2007                  | SRR4072024    | Northern Arizona University    | prairie dog passage | 218  | 218            | 175 | 175 | 92   |
| └              | Yp2009                  | SRR4072019    | Northern Arizona University    | prairie dog passage | 218  | 218            | 175 | 175 | 92   |
| └              | Yp2011                  | SRR4072027    | Northern Arizona University    | prairie dog passage | 218  | 218            | 175 | 175 | 92   |
| └              | Yp2013                  | SRR4072011    | Northern Arizona University    | prairie dog passage | 218  | 218            | 175 | 175 | 92   |
| └              | Yp2015                  | SRR4072017    | Northern Arizona University    | prairie dog passage | 218  | 218            | 175 | 175 | 92   |
| └              | Yp2017                  | SRR4072025    | Northern Arizona University    | prairie dog passage | 218  | 218            | 175 | 175 | 92   |
| └              | Yp2019                  | SRR4072031    | Northern Arizona University    | prairie dog passage | 218  | 218            | 175 | 175 | 92   |
| └              | Yp2020                  | SRR4072023    | Northern Arizona University    | prairie dog passage | 218  | 218            | 175 | 175 | 92   |
| └              | Yp2022                  | SRR4072028    | Northern Arizona University    | prairie dog passage | 218  | 218            | 175 | 175 | 92   |
| └              | Yp2023                  | SRR4072032    | Northern Arizona University    | prairie dog passage | 218  | 218            | 175 | 175 | 92   |
| └              | Yp2025                  | SRR4072014    | Northern Arizona University    | prairie dog passage | 218  | 218            | 175 | 175 | 92   |
| └              | Yp2030                  | SRR4072030    | Northern Arizona University    | prairie dog passage | 218  | 218            | 175 | 175 | 92   |
| └              | Yp2031                  | SRR4072012    | Northern Arizona University    | prairie dog passage | 218  | 218            | 175 | 175 | 92   |
| └              | Yp2034                  | SRR4072015    | Northern Arizona University    | prairie dog passage | 218  | 218            | 175 | 175 | 92   |
| └              | Yp2035                  | SRR4072018    | Northern Arizona University    | prairie dog passage | 218  | 218            | 175 | 175 | 92   |
| └              | Yp2037                  | SRR4072016    | Northern Arizona University    | prairie dog passage | 218  | 218            | 175 | 175 | 92   |
| └              | Yp2039                  | SRR4072022    | Northern Arizona University    | prairie dog passage | 218  | 218            | 175 | 175 | 92   |
| └              | Yp2040                  | SRR4072026    | Northern Arizona University    | prairie dog passage | 218  | 218            | 175 | 175 | 92   |
| └              | Yp2043                  | SRR4072033    | Northern Arizona University    | prairie dog passage | 218  | 218            | 175 | 175 | 92   |
| └              | Yp2045                  | SRR4072021    | Northern Arizona University    | prairie dog passage | 218  | 218            | 175 | 175 | 92   |
| └              | Yp2047                  | SRR4072029    | Northern Arizona University    | prairie dog passage | 218  | 218            | 175 | 175 | 92   |
| └              | Yp2049                  | SRR4072013    | Northern Arizona University    | prairie dog passage | 218  | 218            | 175 | 175 | 92   |

**Supplementary Figure 2. Uberstrains and Sub-strains.** A) The Search Dialog in default mode only retrieves Uberstrains, and does not retrieve any associated Sub-strains. Uberstrains are indicated by a black square to the left of the Uberstrain barcode designation at the left. The example shows two distinct variants of *Y. pestis* CO92, one which was sequenced in 2001 and a second sequenced in 2015, in which 13 erroneous SNP calls have been corrected. B) Showing sub-strains. Even when the workspace contains sub-strains, it does not show them as a default behaviour. When the checkbox Show Sub Strains is clicked in the search dialog, the browser shows a triangle at the far left of Uberstrains that contain one or more Sub-strains. Clicking on the triangle opens a previously hidden tree-like hierarchy containing all its sub-strains. View>Show All Sub-strains in the top browser Menu opens such hierarchies for all Uberstrains in the browser window, and clicking on View\Close all Sub-strains reverts to showing only Uberstrains.

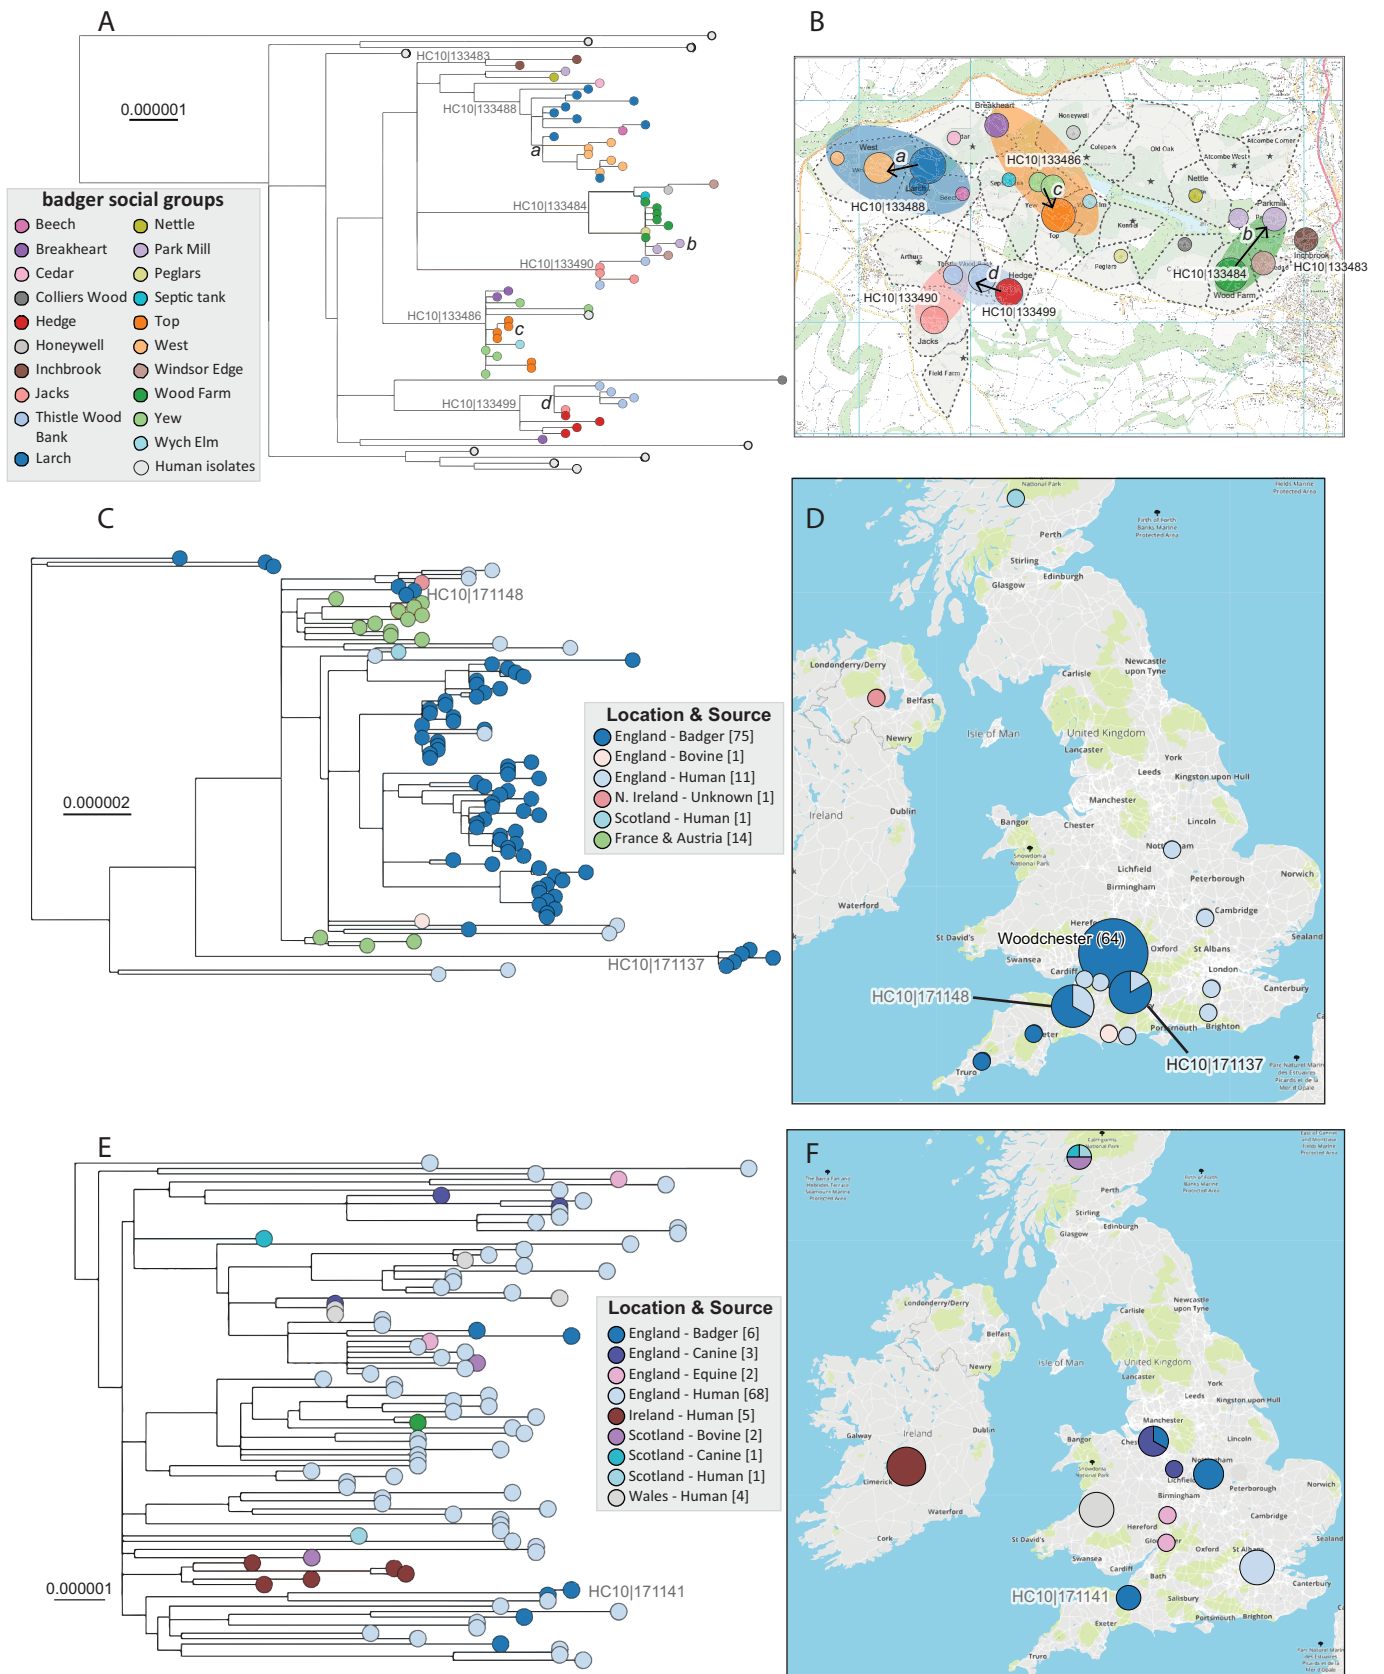

**Supplementary Figure 3. Phylodynamics of isolates from badgers.** A GrapeTree of *Agama* isolates was used to transfer individual subtrees plus their GPS coordinates and metadata to MicroReact (Argimon *et al.* 2016) as described in the GrapeTree Reference Manual (<http://tinyurl.com/GrapeTreeRefManual>). The trees at the left side are phylogenetic trees drawn by MicroReact and the maps at the right side are geographical locations within MicroReact, except that in part B they were overlaid by the idealized spatial distributions of badger social groups and sets as elucidated by (McDonald *et al.* 2018). (A, B) Phylogenetic tree and geographical map of 64 *Agama* isolates from badgers in Woodchester Park that were collected in 2006-2007. Four HierCC HC10 clusters (colored ovals in part B) of genetically related genomes which differ by <11 cgMLST alleles were isolated from neighbouring social groups, and are inferred to have moved by local transmission chain *a*, *b*, *c*, *d*. An interactive version of the MicroReact project can also be found at <https://microreact.org/project/t7q1SSslh/3e634888>. (C, D) Phylogenetic tree and geographical map of 75 *Agama* isolates from badgers in Woodchester Park and elsewhere in England in HC100|2433 that were collected between 1998 and 2010. An interactive version of the MicroReact project can also be found at <https://microreact.org/project/9XUC7i-Fm/fed65ff5>. (E, F) Phylogenetic tree and geographical map of 6 *Agama* isolates from badgers in England in HC100|299 that were collected between 2009 and 2016. An interactive version of the MicroReact project can also be found at <https://microreact.org/project/XaJm1cNjY/69748fe3>.

A

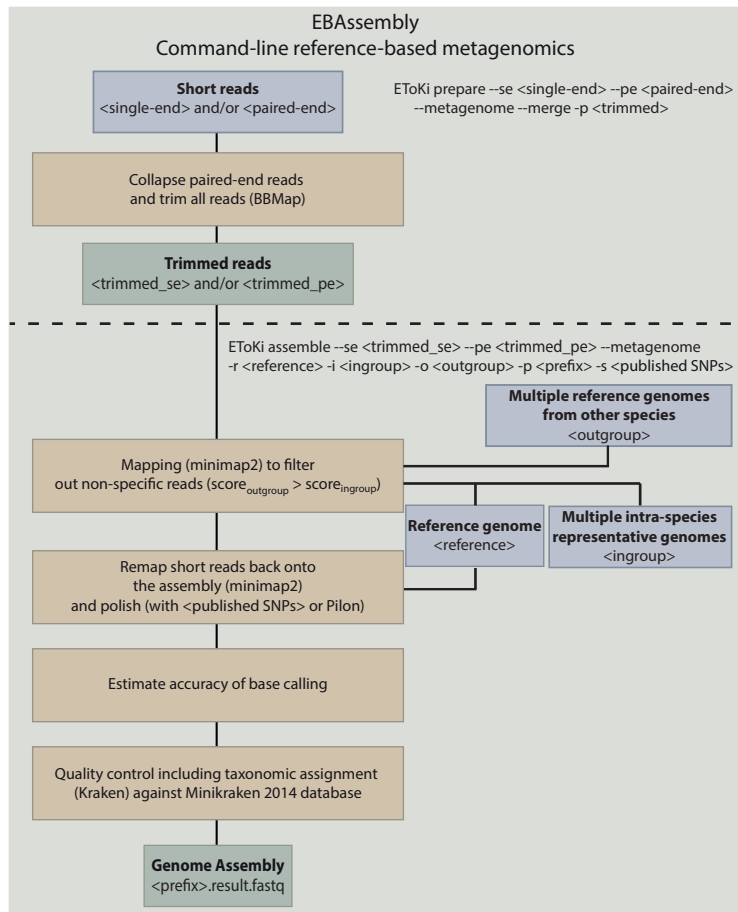

**Supplementary Figure 4. Extracting aDNA assemblies from metagenomic sequences with the EBAsembly module of EToKi.** EBAsembly includes functions for extracting genome-specific reads from metagenomic sequences which are only accessible in the stand-alone, command-line version of EToKi. The EToKi prepare module can collapse paired-end reads and trim both paired-end and single-end reads without down-sampling. As described in the documentation (<https://github.com/zhem-zhou/EToKi>), the EToKi assemble module incorporates elements from SPARSE (Zhou *et al.* 2018b) to identify genome-specific short reads within metagenomic sequences after specifying a reference genome sequence, an in-group of related genomes and a related but distinct out-group of genomes. The module replaces nucleotides in the reference genome by their calculated SNVs after checking that they are supported by at least 3 metagenomic reads, and the supporting read frequencies occur with at least one-third of the average read depth. It also allows constraining SNP calls to (published) SNPs within a text file, and save the modified sequence of the reference genome in a form which can be uploaded to EnteroBase by admins and curators.

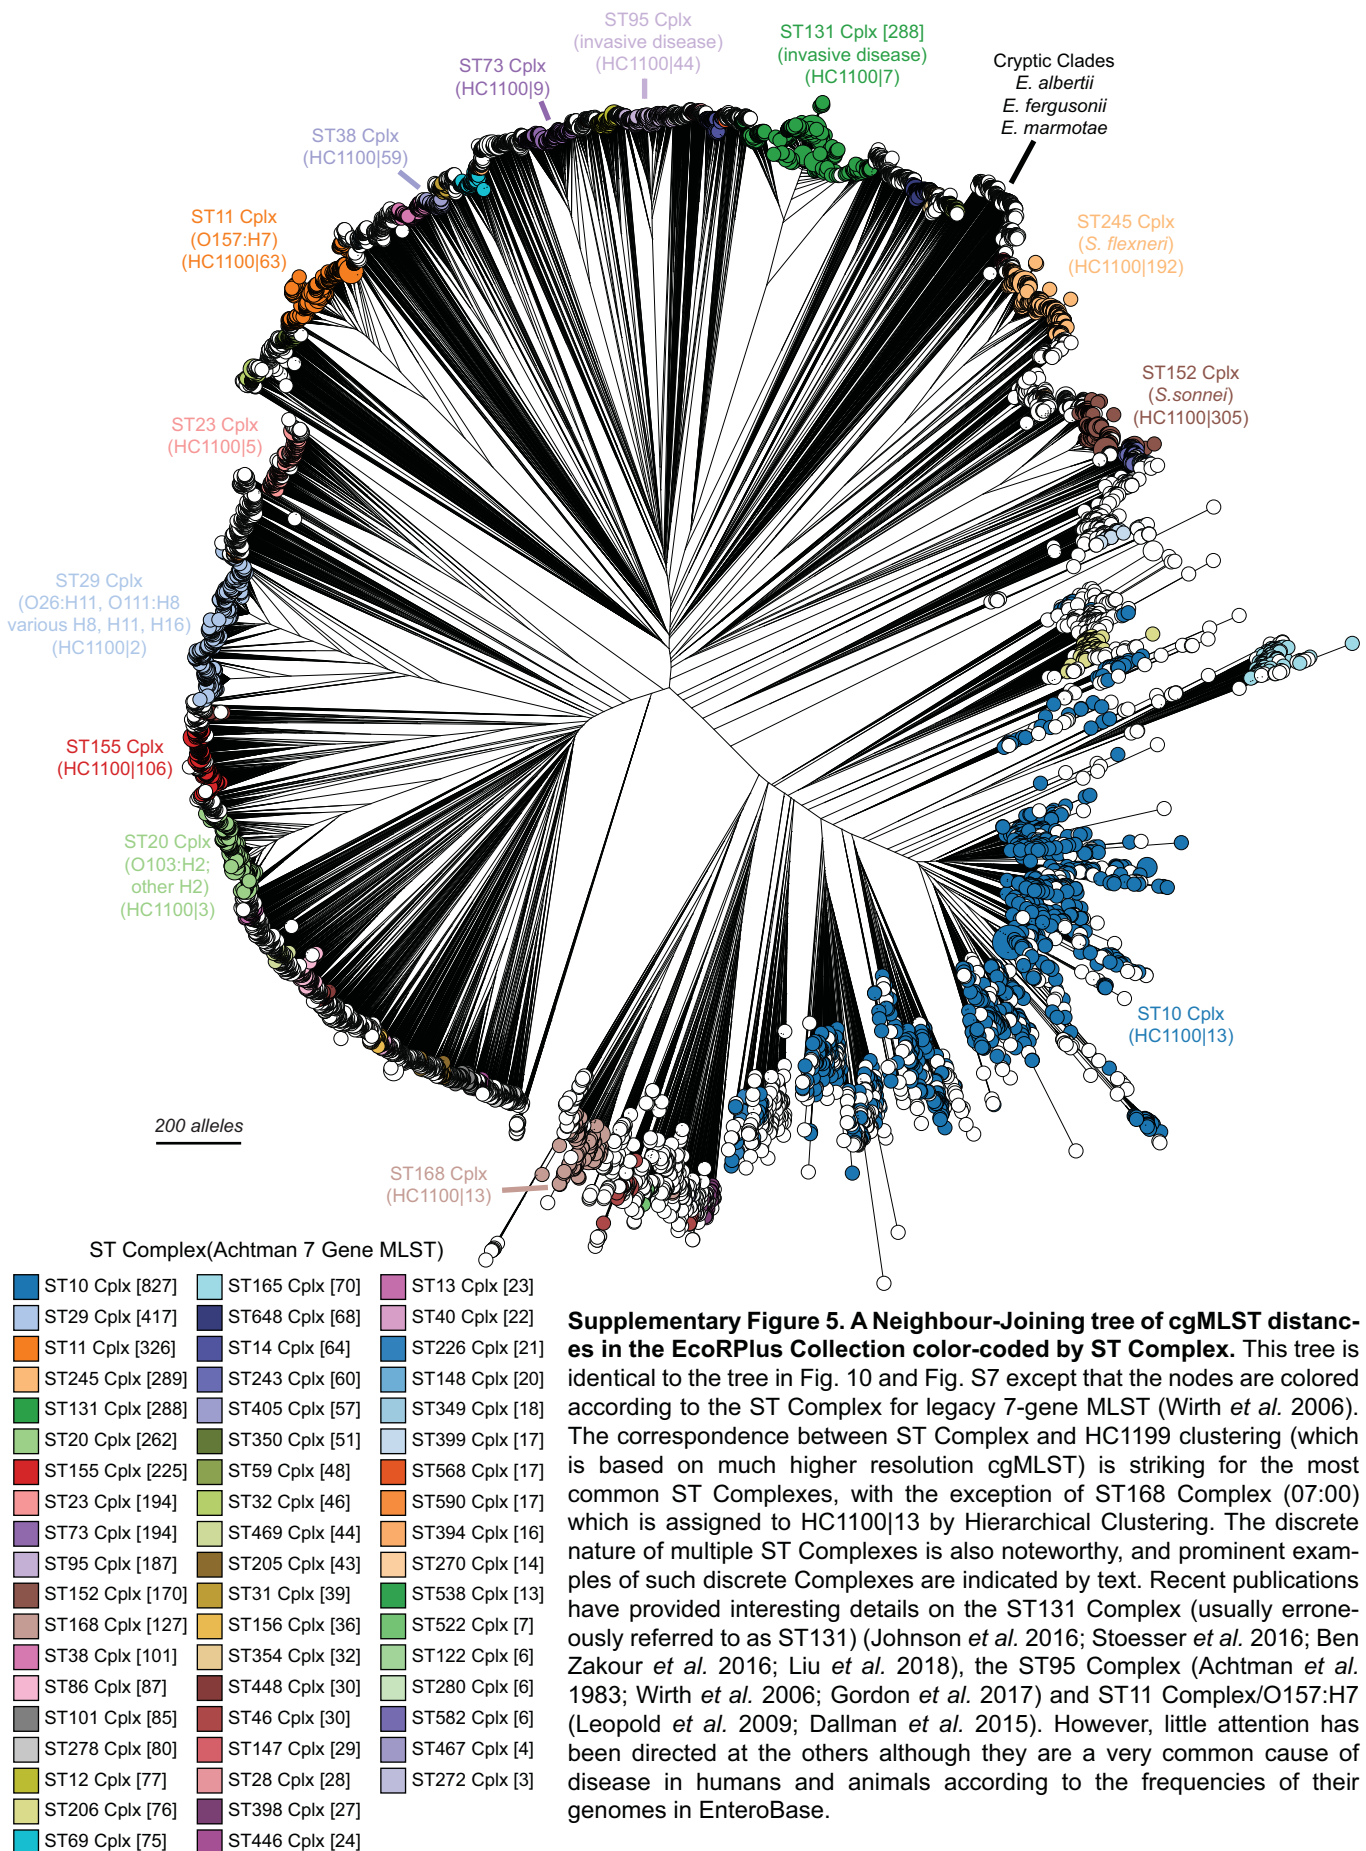

**Supplementary Figure 5. A Neighbour-Joining tree of cgMLST distances in the EcoRPlus Collection color-coded by ST Complex.** This tree is identical to the tree in Fig. 10 and Fig. S7 except that the nodes are colored according to the ST Complex for legacy 7-gene MLST (Wirth *et al.* 2006). The correspondence between ST Complex and HC1199 clustering (which is based on much higher resolution cgMLST) is striking for the most common ST Complexes, with the exception of ST168 Complex (07:00) which is assigned to HC1100|13 by Hierarchical Clustering. The discrete nature of multiple ST Complexes is also noteworthy, and prominent examples of such discrete Complexes are indicated by text. Recent publications have provided interesting details on the ST131 Complex (usually erroneously referred to as ST131) (Johnson *et al.* 2016; Stoesser *et al.* 2016; Ben Zakour *et al.* 2016; Liu *et al.* 2018), the ST95 Complex (Achtman *et al.* 1983; Wirth *et al.* 2006; Gordon *et al.* 2017) and ST11 Complex/O157:H7 (Leopold *et al.* 2009; Dallman *et al.* 2015). However, little attention has been directed at the others although they are a very common cause of disease in humans and animals according to the frequencies of their genomes in EnteroBase.

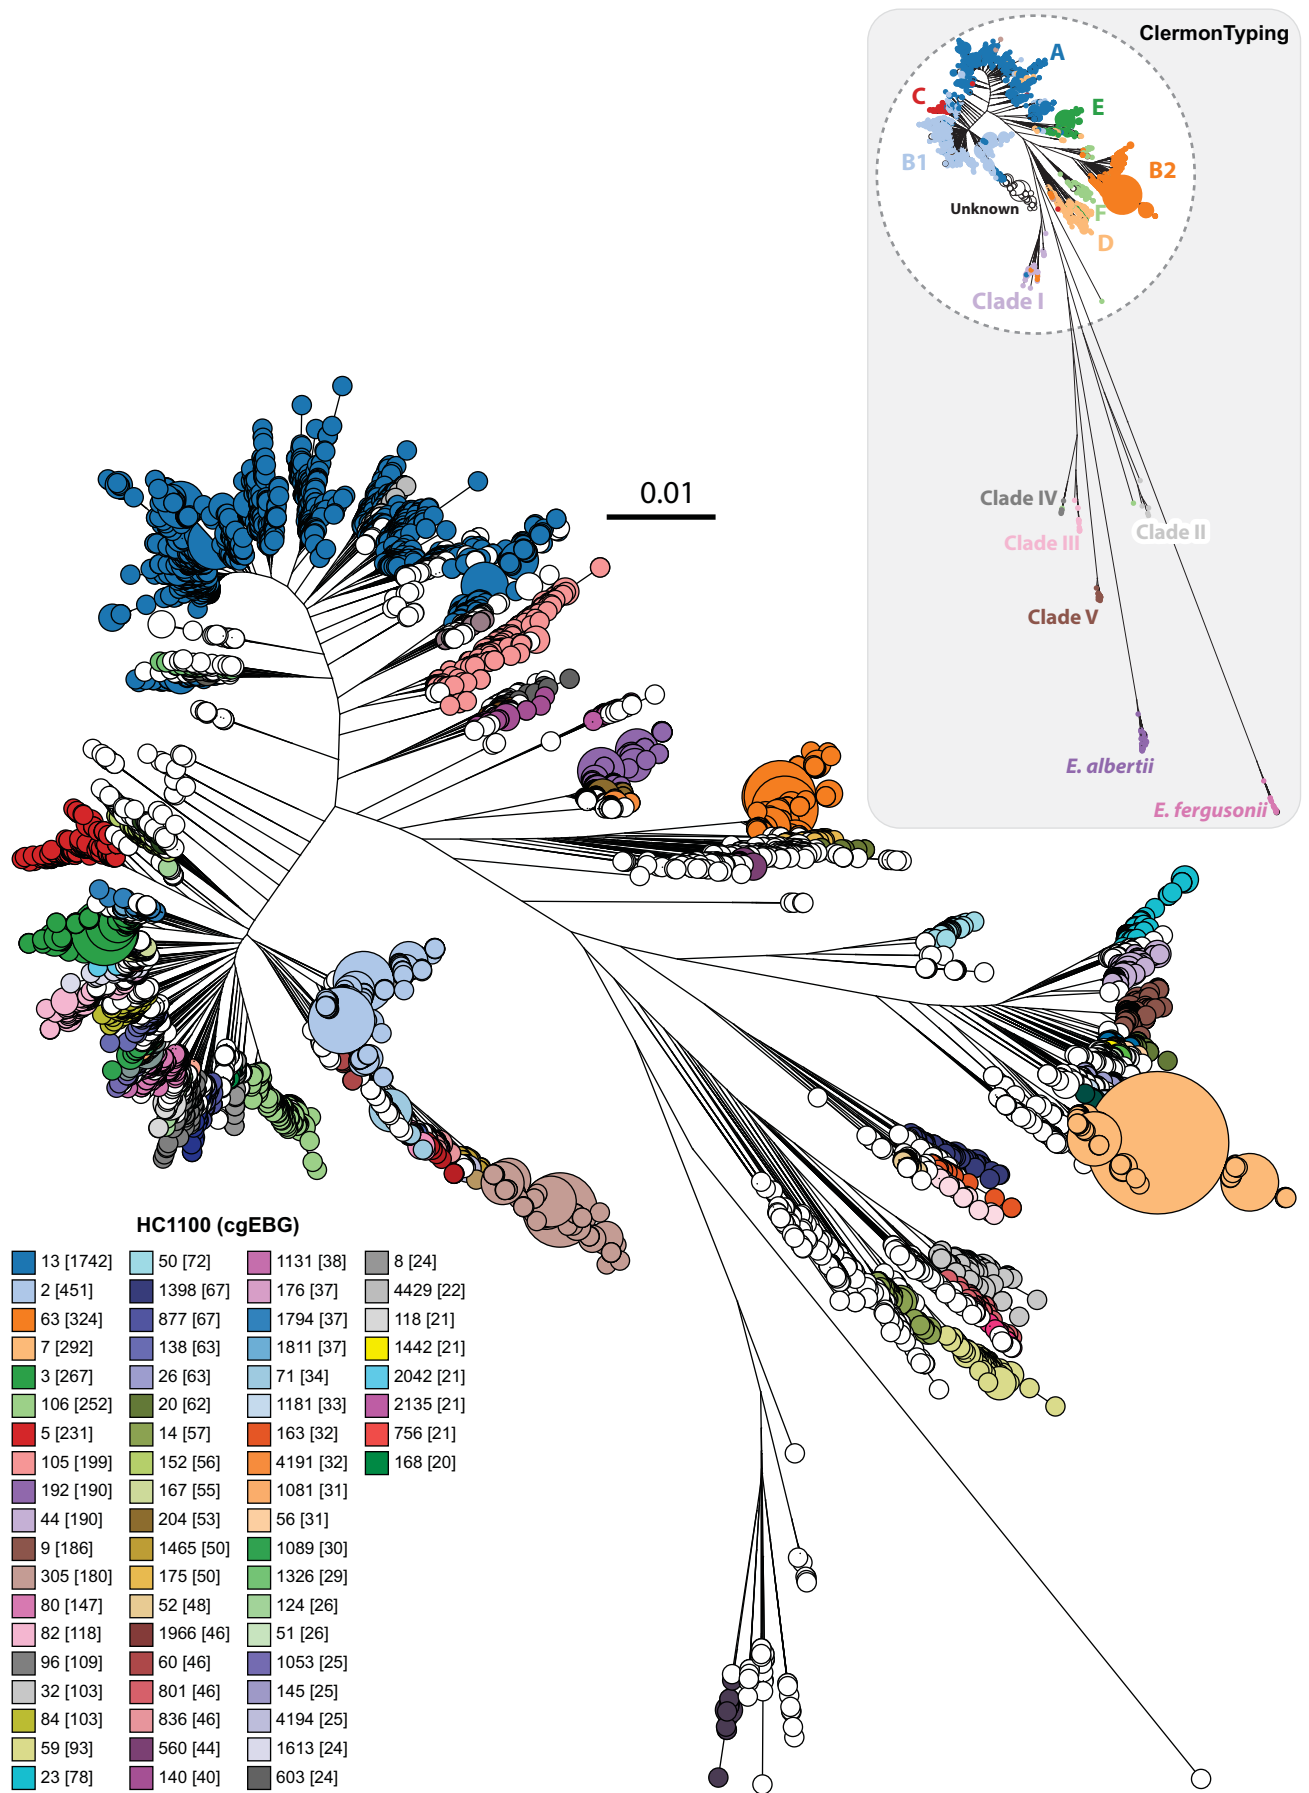

**Supplementary Figure 6. A Maximum-Likelihood (ML) tree of the EcoRPlus Collection.** 1,230,995 core SNPs were extracted from the concatenated sequences (2.33 Mbps) of the 2,513 core gene alignments (MAFFT (Katoh and Standley 2013)) from 9,479 core genomes. A maximum likelihood tree was calculated using FASTTREE 2 (Price *et al.* 2010). Inset) Tree of all genomes color-coded by ClermonTyping, including the Cryptic Clades I-V and the *Escherichia* species *albertii*, *fergusonii*, and *marmotae*. Note that the three genomes of *E. marmotae* are on a deep branch within Clade V. The white circle encloses genetically-related populations within *E. coli*, including Clade I, whereas the other Clades and species are on external branches within the gray rectangle. These topological relationships are similar to those described earlier on smaller datasets (Luo *et al.* 2011) except that *E. marmotae* was not included. Main figure) Closeup of genomes on branches within the inner circle of the inset, color-coded by HC1100 HierCC cluster. This ML clustering of individual genomes is concordant with the clustering according to the neighbour-joining algorithm in Fig. 10, while providing much more accurate branch lengths. However, this tree also took several weeks to complete.

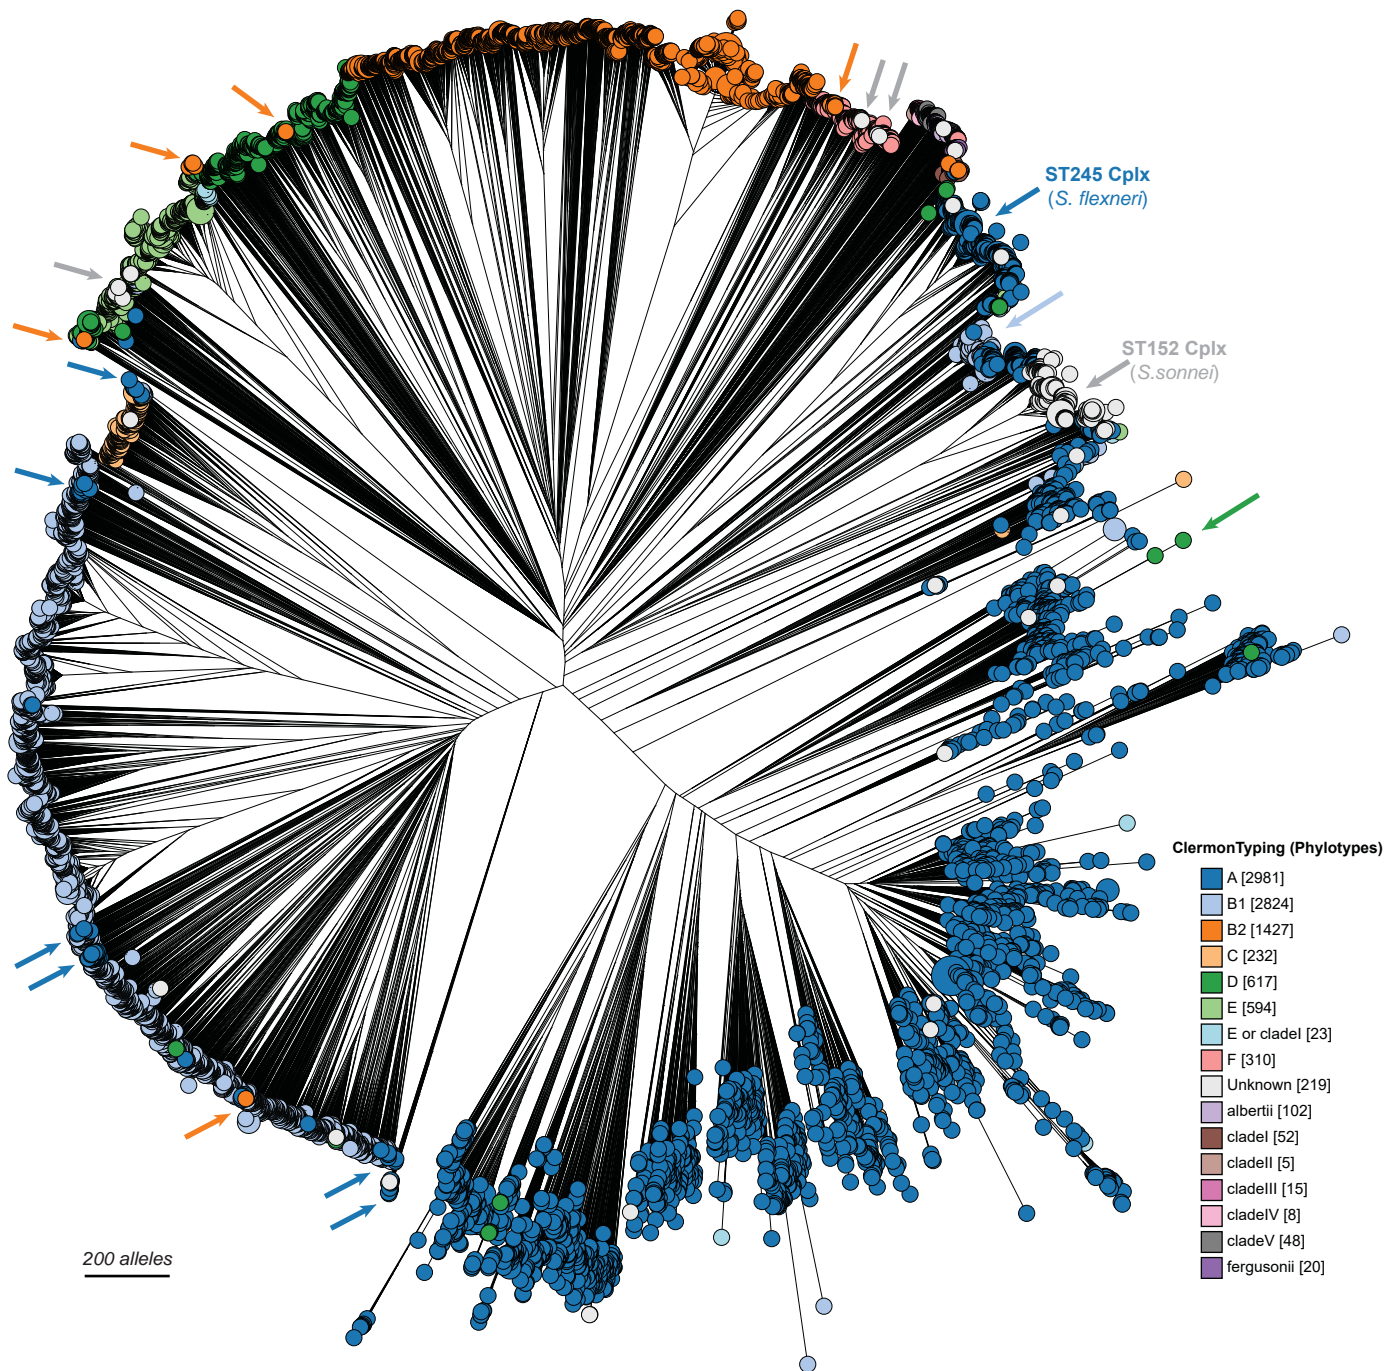

**Supplementary Figure 7. A Neighbour-Joining tree of cgMLST distances in the EcoRPlus Collection color-coded by Clermont types.** This tree is identical to the tree in Fig. 10 and Fig. S5 except that the nodes show the Clermont Types predicted by the program ClermontTyping (Beghain *et al.* 2018), which has been implemented within Enterobase. Large parts of the tree are relatively homogeneous, indicating that Clermont Typing often correlates well with HC2000 clustering. However, arrows indicate multiple nodes which differ in Clermont Type from their close neighbors, illustrating that the presence/absence of genes from the accessory genome which is used for the Clermont scheme does not correlate completely with the phylogenetic relationships revealed by cgMLST. As a result, nodes assigned to Clermont Types A and B2 are found at multiple positions within the tree, far from most other strains of those Clermont types. In addition, two groups of *Shigella* are inaccurately labelled by Clermont Types. ST245 Complex largely corresponds to *Shigella flexneri* (Wirth *et al.* 2006), but is inappropriately assigned to Clermont Type A. Similarly, ST152 Complex largely corresponds to *Shigella sonnei* but is not recognized by Clermont Typing.
